# Supplementary material for: Effects of cyanidin 3-O-glucoside and hydrochlorothiazide on T-cell phenotypes and function in spontaneously hypertensive rats
Source: Royal Society of Chemistry journal article supplement (doi:10.1039/d0fo01778g), 2020-01-01
Supplement: d0fo01778g1.pdf [file d0fo01778g1.pdf]

Fluorescent reagents used

| Mix | Probe | Fluorochrome | Clone   | Vendor<br>Cat.No.      | Isotype<br>Control | Vendor<br>Cat.No |
|-----|-------|--------------|---------|------------------------|--------------------|------------------|
| 1   | CD3   | APC          | IF4     | BD<br>557030           | Ms IgM, κ          | BD<br>550883     |
| 1   | CD4   | PE-Cy™7      | OX-35   | BD<br>561578           | Ms IgG2a, κ        | BD<br>560906     |
| 1   | CD8   | PerCP        | OX-8    | BD<br>558824           | Ms IgG1, κ         | BD<br>550672     |
| 1   | CD62L | PE           | HRL1    | BD<br>551398           | Ham IgG2, λ1       | BD<br>553965     |
| 1   | CD44  | FITC         | OX-49   | BD<br>550974           | Ms IgG2a, κ        | BD<br>554647     |
| 2   | CD3   | FITC         | IF4     | BD<br>557354           | Ms IgM, κ          | BD<br>554647     |
| 2   | CD4   | PE-Cy™7      | OX-35   | BD<br>561578           | Ms IgG2a, κ        | BD<br>560906     |
| 2   | CD8   | PerCP        | OX-8    | BD<br>558824           | Ms IgG1, κ         | BD<br>550672     |
| 2   | CD25  | APC          | OX39    | eBioscience<br>17-0390 | Ms IgG1            | BD<br>554681     |
| 2   | FOXP3 | PE           | FJK-16s | eBioscience<br>72-5775 | Rat IgG2a, k       | na               |
