# Supplementary material for: Effects of cyanidin 3-O-glucoside and hydrochlorothiazide on T-cell phenotypes and function in spontaneously hypertensive rats
Source: Royal Society of Chemistry journal article supplement (doi:10.1039/d0fo01778g), 2020-01-01
Supplement: d0fo01778g2.pdf [file d0fo01778g2.pdf]

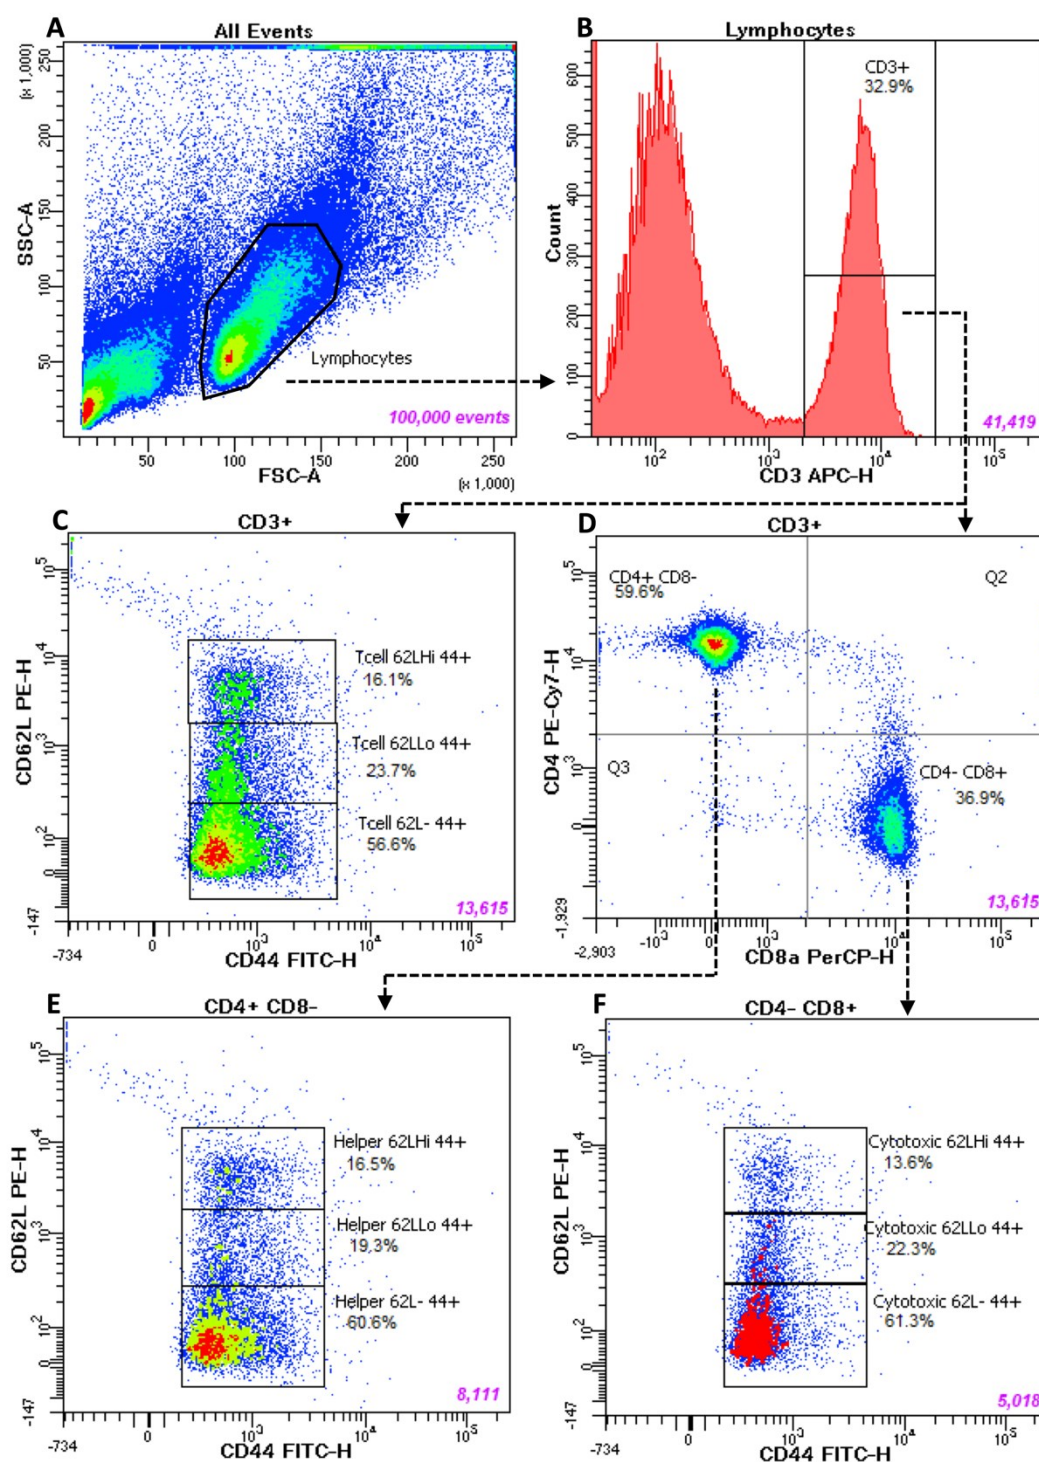

Representative flow cytometry plot for mix 1. Definition of viable lymphocytes (A); Definition of CD3 binding after gating on lymphocytes (B); Definition of CD62L and CD44 after gating on CD3+ lymphocytes (C); Definition of CD4 and CD8 binding after gating on CD3+ lymphocytes (D); Definition of CD62L and CD44 after gating on CD3+CD4-CD8- lymphocytes (E); Definition of CD62L and CD44 after gating on CD3+CD4-CD8+ lymphocytes (F).
