# Supplementary material for: Effects of cyanidin 3-O-glucoside and hydrochlorothiazide on T-cell phenotypes and function in spontaneously hypertensive rats
Source: Royal Society of Chemistry journal article supplement (doi:10.1039/d0fo01778g), 2020-01-01
Supplement: d0fo01778g3.pdf [file d0fo01778g3.pdf]

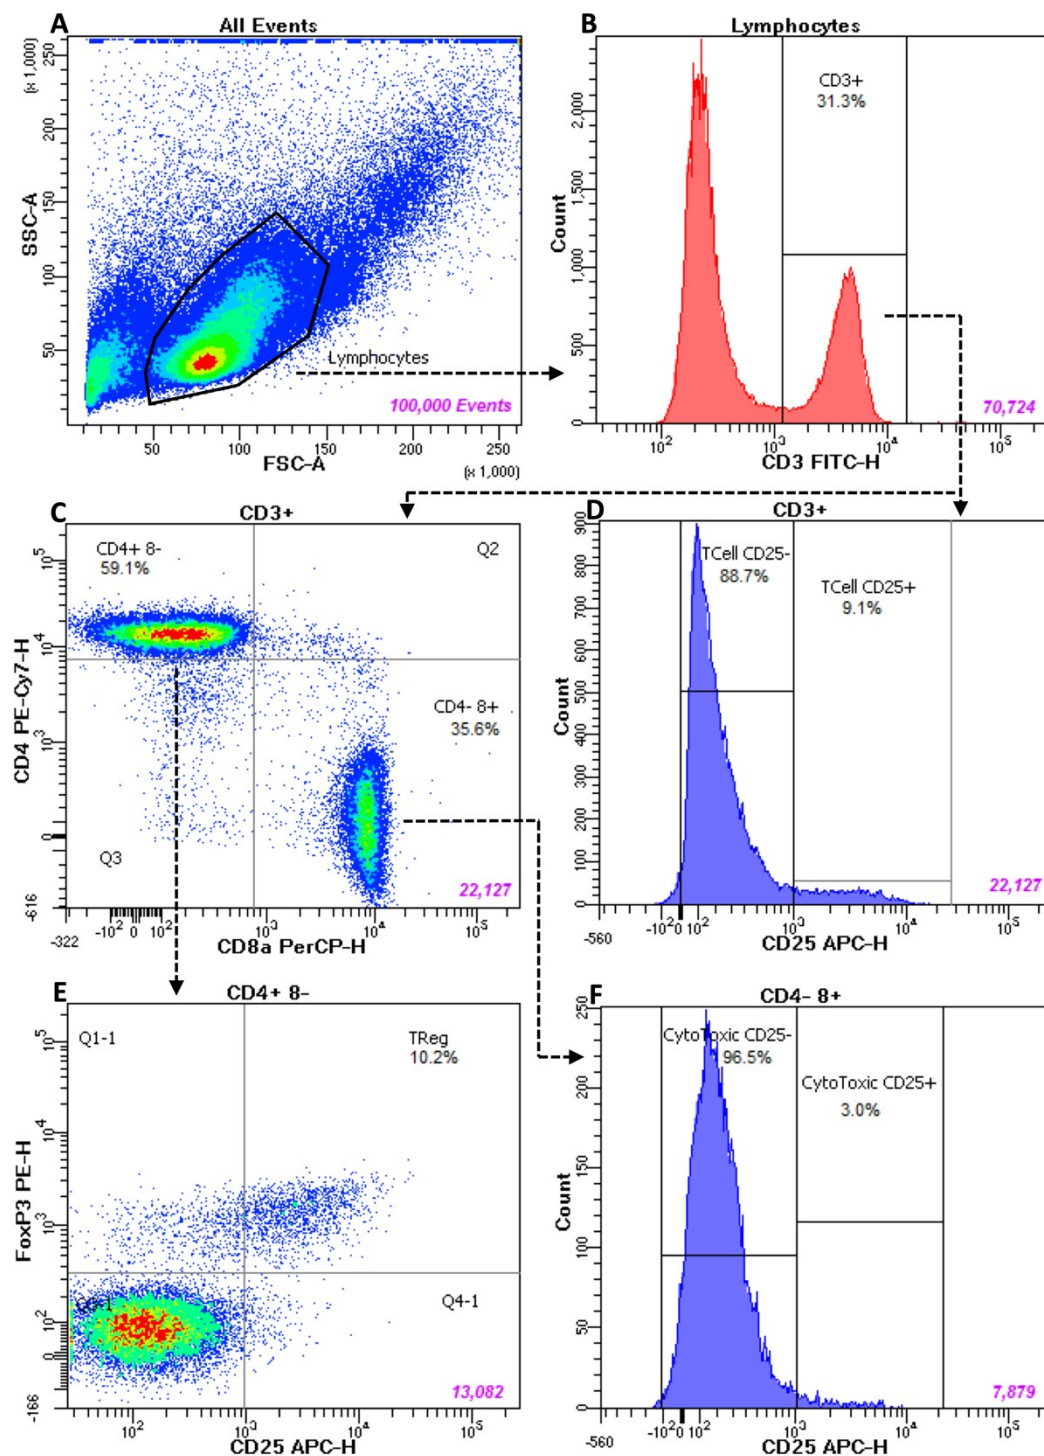

Representative flow cytometry plot for mix 2. Definition of viable lymphocytes (A); Definition of CD3 binding after gating on lymphocytes (B); Definition of CD4 and CD8 after gating on CD3+ lymphocytes (C); Definition of CD25 binding after gating on CD3+ lymphocytes (D); Definition of Foxp3 and CD25 after gating on CD3+CD4+CD8- lymphocytes (E); Definition of CD25 binding after gating on CD3+CD4+CD8+ lymphocytes (F).
