# Supplementary material for: Effects of cyanidin 3-O-glucoside and hydrochlorothiazide on T-cell phenotypes and function in spontaneously hypertensive rats
Source: Royal Society of Chemistry journal article supplement (doi:10.1039/d0fo01778g), 2020-01-01
Supplement: d0fo01778g4.pdf [file d0fo01778g4.pdf]

T-cell phenotypes based on cell surface / intracellular makers

|                             | CD3 | CD4 | CD8 | CD25 | CD44 | CD62L | FOXP3 |
|-----------------------------|-----|-----|-----|------|------|-------|-------|
| T-Cells                     | +   |     |     |      |      |       |       |
| Helper T-cells              | +   | +   | -   |      |      |       |       |
| Cytotoxic T-cells           | +   | -   | +   |      |      |       |       |
| Naïve T-cells               | +   |     |     |      | +    | hi    |       |
| Naïve helper T-cells        | +   | +   | -   |      | +    | hi    |       |
| Naïve cytotoxic T-cells     | +   | -   | +   |      | +    | hi    |       |
| Memory T-cells              | +   |     |     |      | +    | lo    |       |
| Memory helper T-cells       | +   | +   | -   |      | +    | lo    |       |
| Memory cytotoxic T-cells    | +   | -   | +   |      | +    | lo    |       |
| Effector T-cells            | +   |     |     |      | +    | -     |       |
| Effector helper T-cells     | +   | +   | -   |      | +    | -     |       |
| Effector cytotoxic T-cells  | +   | -   | +   |      | +    | -     |       |
| Activated T-cells           | +   |     |     | +    |      |       |       |
| Activated helper T-cells    | +   | +   | -   | +    |      |       |       |
| Activated cytotoxic T-cells | +   | -   | +   | +    |      |       |       |
| Regulatory T-cells          | +   | +   | -   | +    |      |       | +     |
